# Supplementary material for: Potential Use of Copper-Contaminated Soils for Hemp (Cannabis sativa L.) Cultivation
Source: MDPI journal article supplement (doi:10.3390/environments8110111), 2021-10-20
Supplement: s1 [file s1]

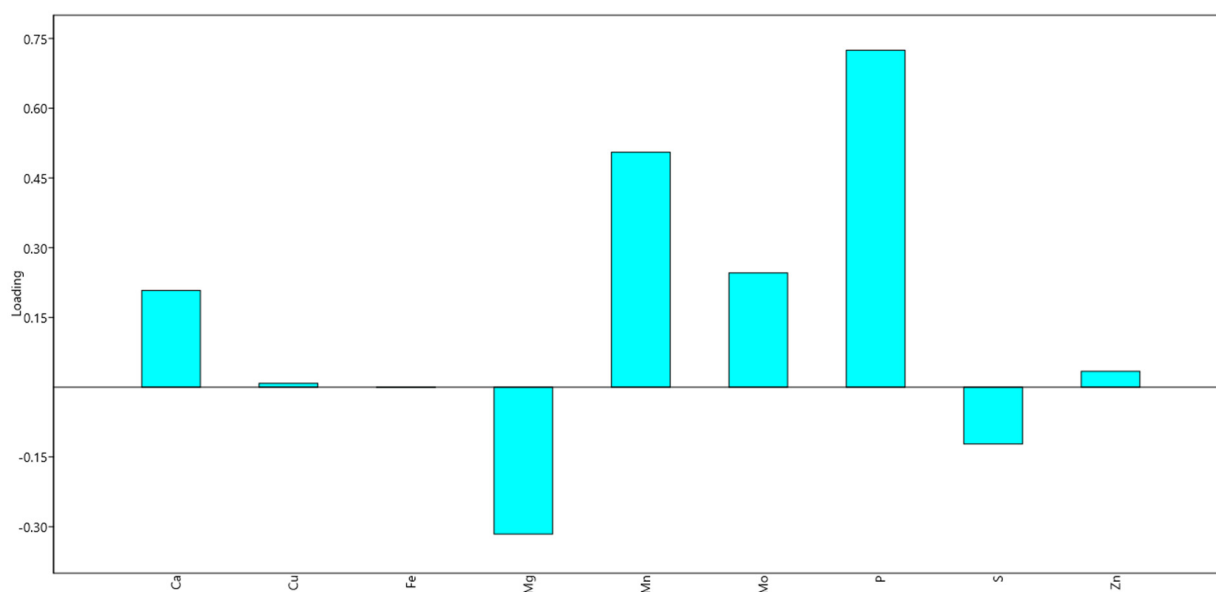

**Figure S1:** Principal component analysis (PCA) loading plot along PC1 of shoot ionome of hemp plants grown hydroponically in four different growth conditions: control (C = 1.2 mM sulfate and 0.2  $\mu$ M CuSO<sub>4</sub>); sulfate treatment (ES = 2.4 mM sulfate and 0.2  $\mu$ M CuSO<sub>4</sub>); excess Cu (+Cu = 1.2 mM sulfate and 20  $\mu$ M CuSO<sub>4</sub>); excess Cu and sulfate treatment (ES+Cu = 2.4 mM sulfate and 20  $\mu$ M CuSO<sub>4</sub>).

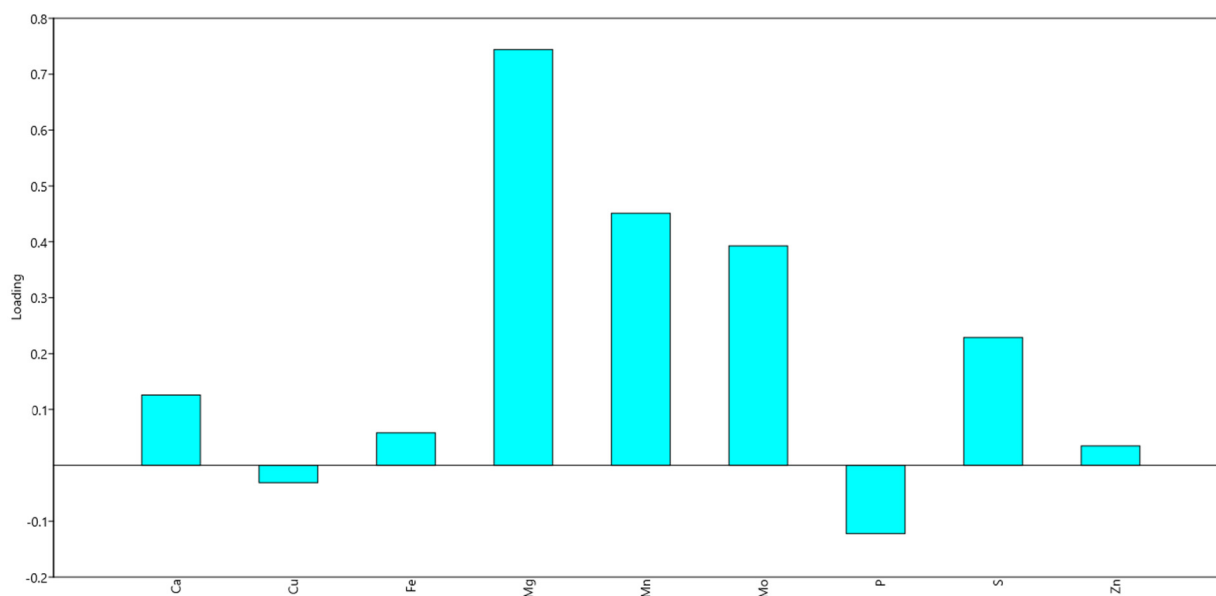

**Figure S2:** Principal component analysis (PCA) loading plot along PC2 of shoot ionome of hemp plants grown hydroponically in four different growth conditions: control (C = 1.2 mM sulfate and 0.2  $\mu$ M CuSO<sub>4</sub>); sulfate treatment (ES = 2.4 mM sulfate and 0.2  $\mu$ M CuSO<sub>4</sub>); excess Cu (+Cu = 1.2 mM sulfate and 20  $\mu$ M CuSO<sub>4</sub>); excess Cu and sulfate treatment (ES+Cu = 2.4 mM sulfate and 20  $\mu$ M CuSO<sub>4</sub>).

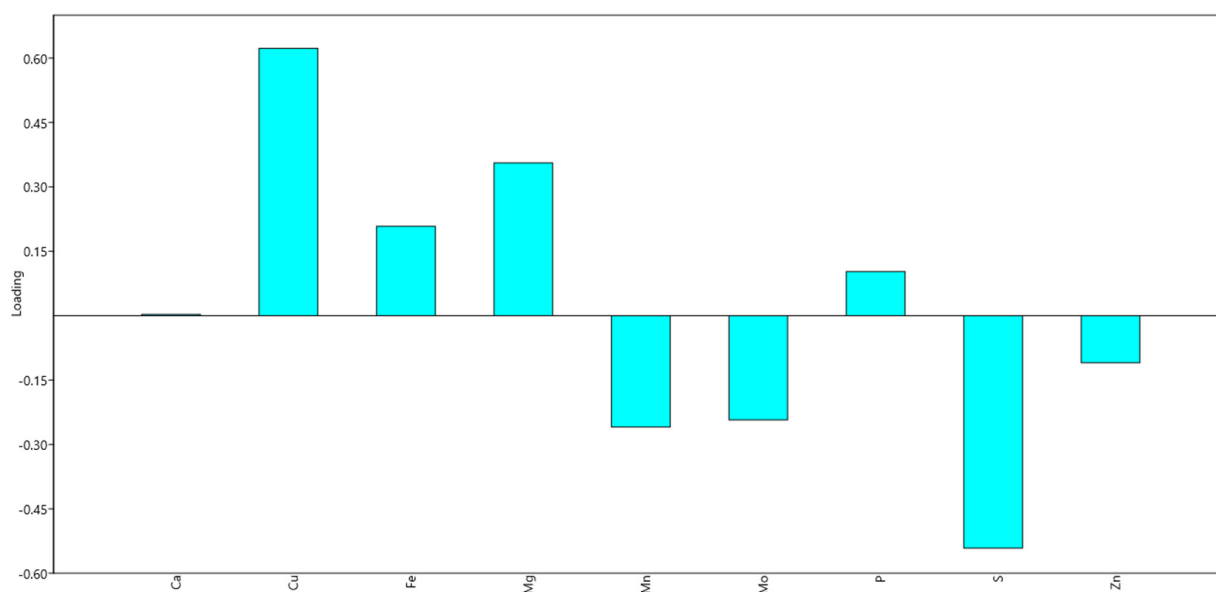

**Figure S3:** Principal component analysis (PCA) loading plot along PC1 of root ionome of hemp plants grown hydroponically in four different growth conditions: control (C = 1.2 mM sulfate and 0.2  $\mu$ M CuSO<sub>4</sub>); sulfate treatment (ES = 2.4 mM sulfate and 0.2  $\mu$ M CuSO<sub>4</sub>); excess Cu (+Cu = 1.2 mM sulfate and 20  $\mu$ M CuSO<sub>4</sub>); excess Cu and sulfate treatment (ES+Cu = 2.4 mM sulfate and 20  $\mu$ M CuSO<sub>4</sub>).

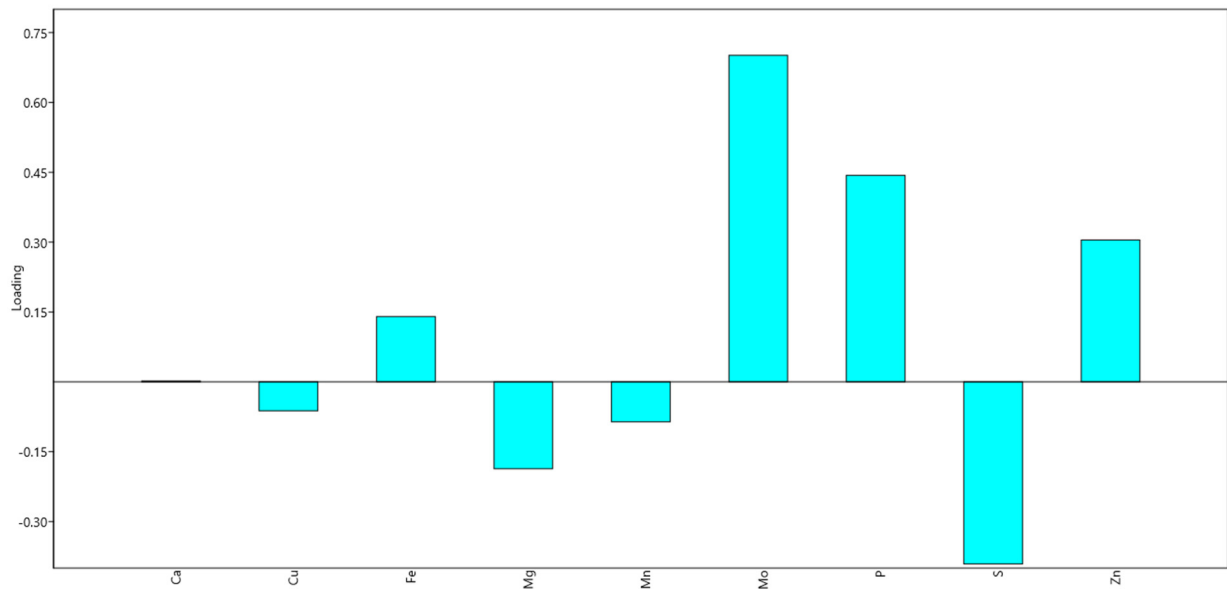

**Figure S4:** Principal component analysis (PCA) loading plot along PC2 of root ionome of hemp plants grown hydroponically in four different growth conditions: control (C = 1.2 mM sulfate and 0.2  $\mu$ M CuSO<sub>4</sub>); sulfate treatment (ES = 2.4 mM sulfate and 0.2  $\mu$ M CuSO<sub>4</sub>); excess Cu (+Cu = 1.2 mM sulfate and 20  $\mu$ M CuSO<sub>4</sub>); excess Cu and sulfate treatment (ES+Cu = 2.4 mM sulfate and 20  $\mu$ M CuSO<sub>4</sub>).
